# Supplementary material
Source: PubMed Central journal article supplement (PMC4988932)
Supplement: NIHMS778555-supplement.pdf [file NIHMS778555-supplement.pdf]

## An Avoidance-Based Rodent Model of Exposure with Response Prevention Therapy

### Supplemental Information

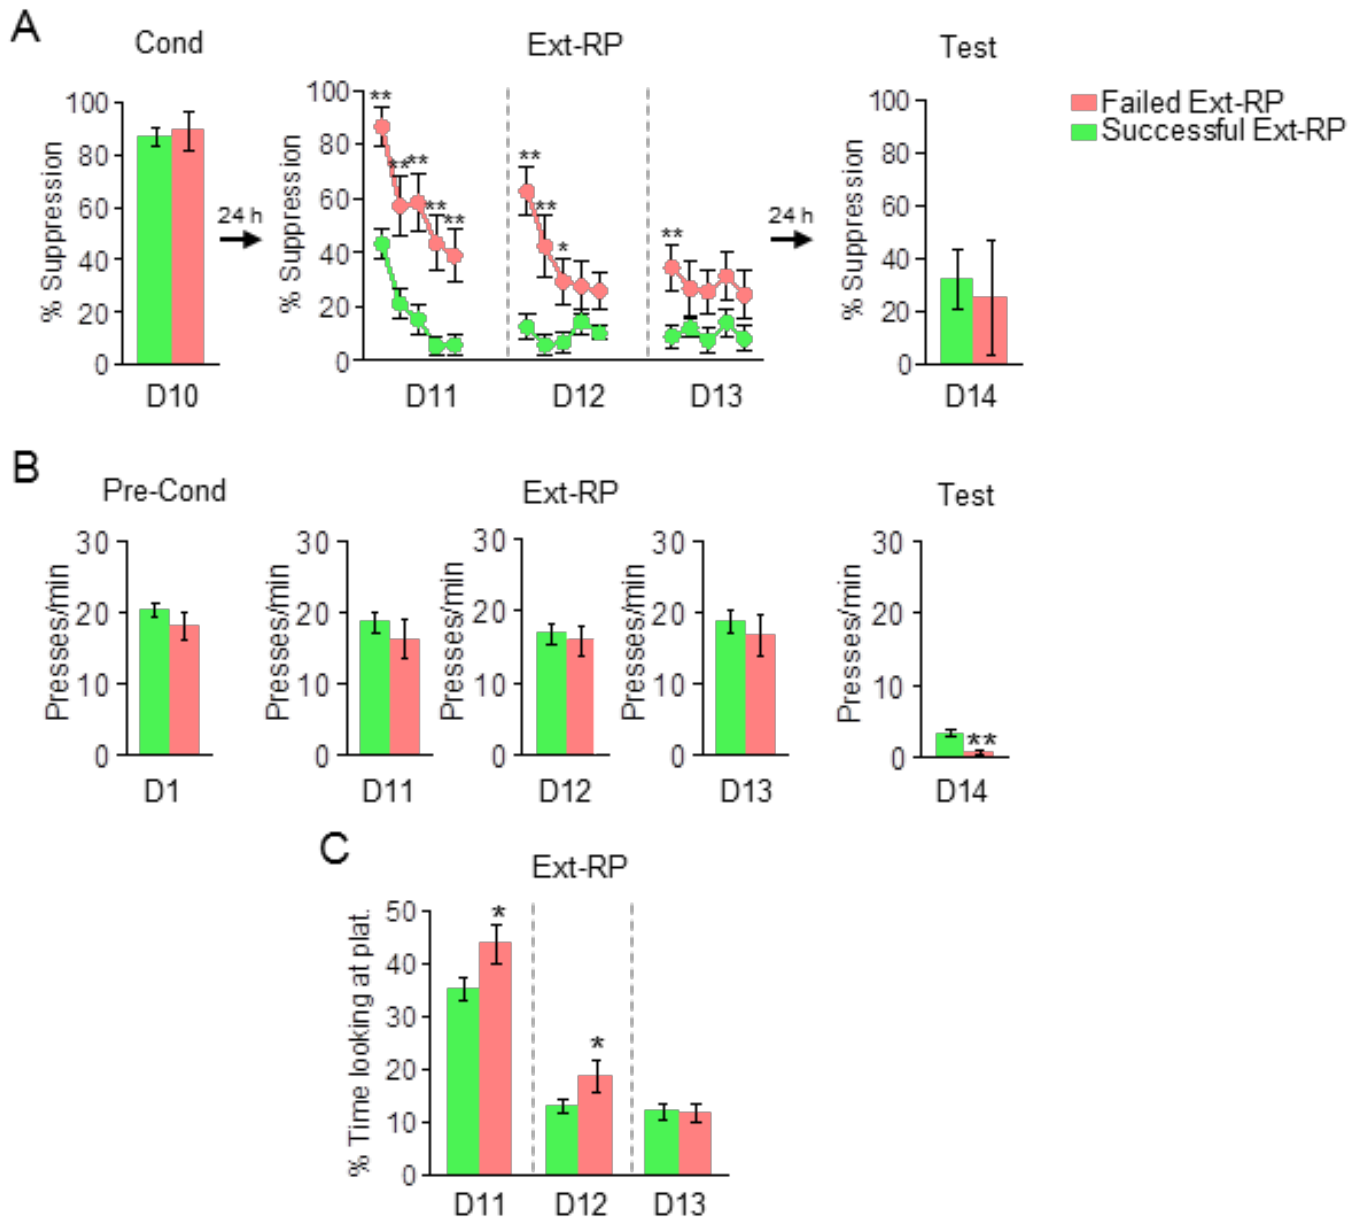

**Figure S1.** Rats that exhibit persistent avoidance also show increased bar press suppression and spend more time looking at the platform during Ext-RP. **(A)** Rats that failed Ext-RP showed elevated bar-press suppression throughout Ext-RP, but not during the last day of avoidance training or test. Data during Ext-RP shown in blocks of three trials. **(B)** Prior to avoidance training and prior to each Ext-RP session both groups had the same motivation to press a bar for food (60 s prior to the first tone presentation). However, prior to test both groups had very low motivation to press a bar for food (< 5 presses/min) and rats that failed Ext-RP pressed significantly less than rats that succeeded Ext-RP (60 s prior to the first tone presentation). **(C)** Rats that failed Ext-RP spent more time looking at the platform during the first minute of sessions 1 & 2 of Ext-RP, but not session 3. All data are shown as mean  $\pm$  SEM. \* $p < 0.05$ , \*\* $p < 0.01$ .
